# Supplementary material for: Late-phase miRNA-controlled oncolytic adenovirus for selective killing of cancer cells
Source: PubMed Central journal article supplement (PMC4467430; doi:10.18632/oncotarget.3350), 2015-01-31
Supplement: oncotarget-06-6179-s001.pdf [file oncotarget-06-6179-s001.pdf]

# Late-phase miRNA-controlled oncolytic adenovirus for selective killing of cancer cells

## Supplementary Material

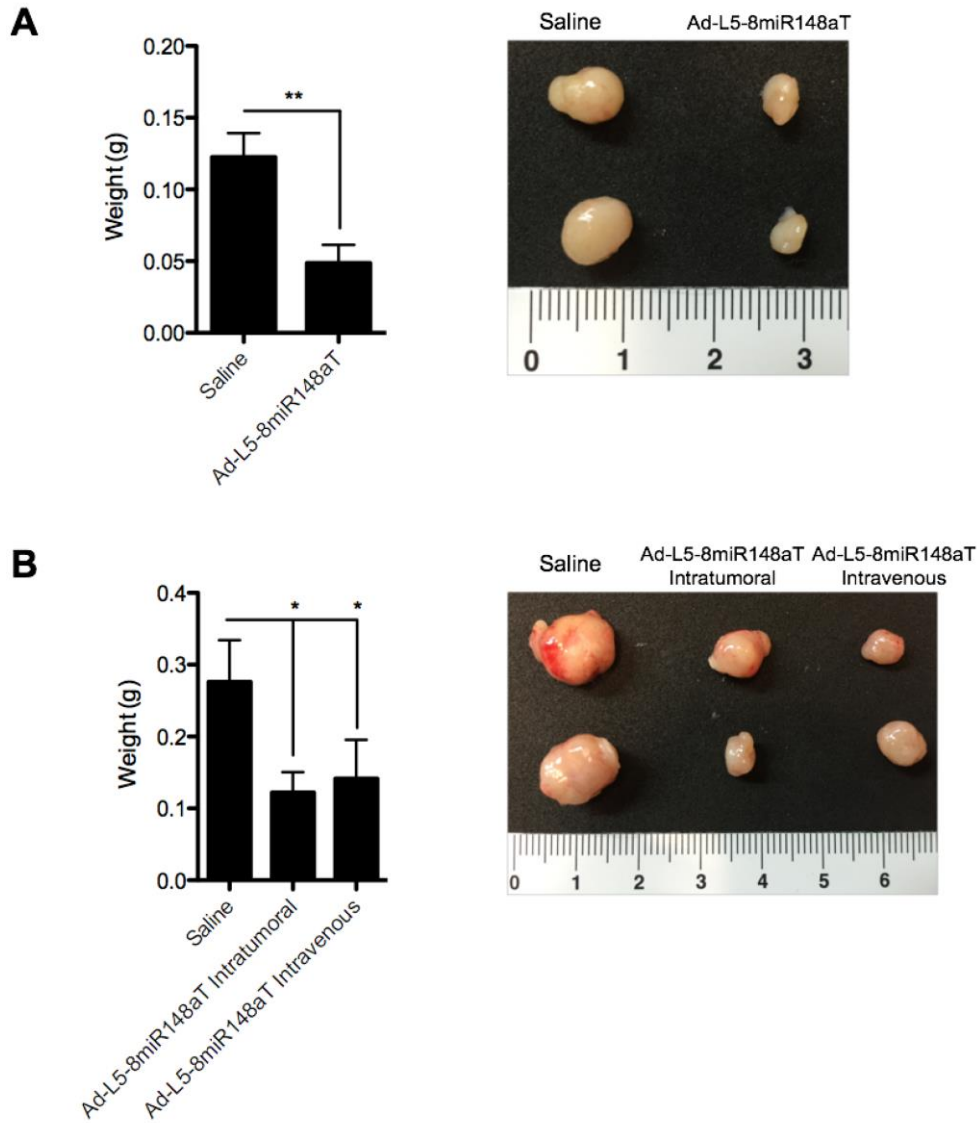

**Supplementary Figure S1: Antitumor efficacy of Ad-L5-8miR148aT.** A) Tumor weight and representative tumor images 35 days post-intratumoral treatment of CP13 PDX. B) Tumor weight and representative tumor images at 25 days post-intratumoral or intravenous treatment of CP15 PDX.

**Table S1: miR-148a cellular content**

| Cell Lines         | $2^{\Delta Ct}$ miR-148a |      |
|--------------------|--------------------------|------|
|                    | MEAN                     | SEM  |
| MIAPaCa-2 miR-148a | 9,87                     | 1,76 |
| MIA PaCa-2 miR-SC  | 0,83                     | 0,35 |
| MIA PaCa-2         | 1,03                     | 0,74 |
| PANC-1             | 1,58                     | 0,37 |
| RWP-1              | 1,60                     | 1,05 |

**Table S2: miR-148a tissue content**

| Mouse tissues | $2^{\Delta Ct}$ miR-148a |       |
|---------------|--------------------------|-------|
|               | MEAN                     | SEM   |
| Pancreas      | 143,00                   | 22,52 |
| Liver         | 52,92                    | 10,02 |
| Kidney        | 2,82                     | 0,48  |
